# Supplementary material
Source: publisher figshare collection journal article supplement (https://tandf.figshare.com/ndownloader/files/15256514)

**The side chain effects on TPD-based copolymers: the linear chain leads to a higher *J*sc**

Qiang Tao,*a,b Yafen Fu,a Qian Liu,a E’Zhou,a Dong Yan,a Zhengjun Fang,a,b Yunfeng Liao,a Xianwei Huang,a Jiyong Deng*a, and Donghong Yu*b,c

*a Hunan Provincial Key Laboratory of Environmental Catalysis & Waste Recycling,School of Chemistry and Chemical Engineering, Hunan Institute of Engineering, Xiangtan 411104, China.*

*bDepartment of Chemistry and Bioscience, Aalborg University, DK-9220 Aalborg, Denmark*

*c Sino-Danish Center for Education and Research (SDC), DK-8000, Aarhus, Denmark*

*E-mails:* [*qt@bio.aau.dk*](mailto:qt@bio.aau.dk)*,* [*djyong@yeah.net*](mailto:djyong@yeah.net)*,* [*yu@bio.aau.dk*](mailto:yu@bio.aau.dk)

Table S1 Photovoltaic parameters of PT1 and PT2-based polymer solar cells in an inverted device.

| polymer | *V*oc (V) | *J*sc  (mA/cm2) | *FF* | PCE (%) |
| --- | --- | --- | --- | --- |
| PT1 | 0.86 | 7.03 | 0.46 | 2.75 |
| PT2 | 0.91 | 3.93 | 0.51 | 1.83 |





Figure S1 *J*–*V* characteristics of PT1 and PT2 with an inverted device configuration of ITO/ZnO/Polymer:PC71BM/MoO3/Al.

Figure S2.1H NMR spectra of PT1 and PT2.


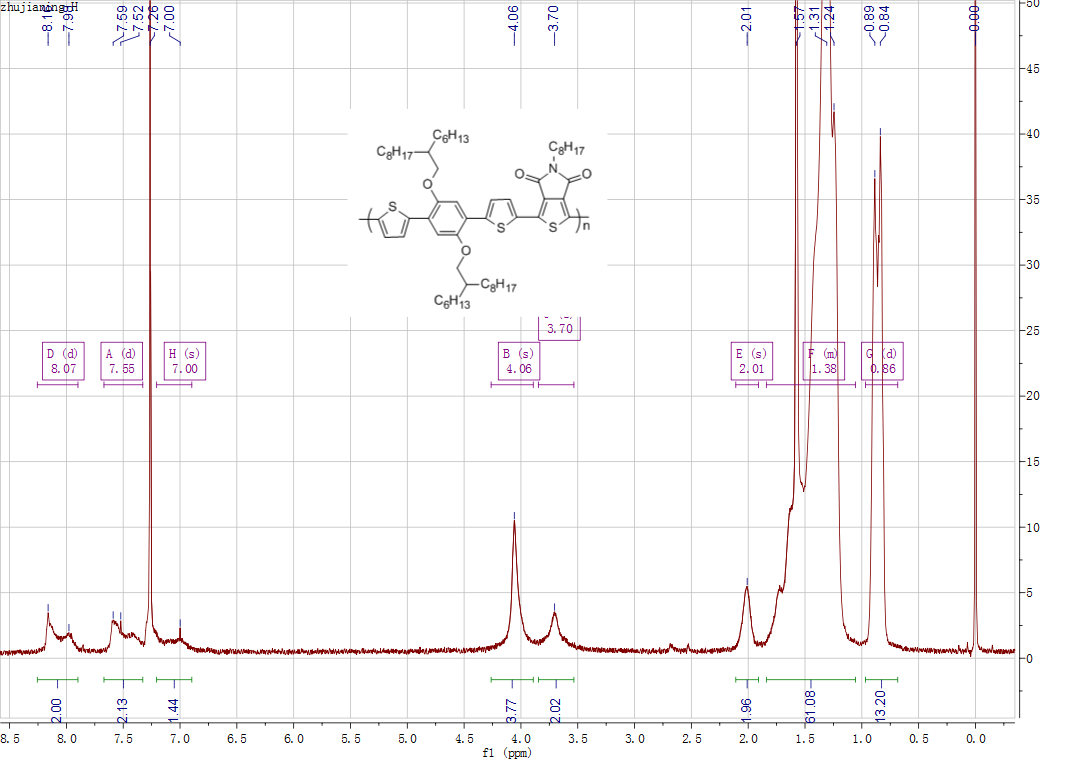


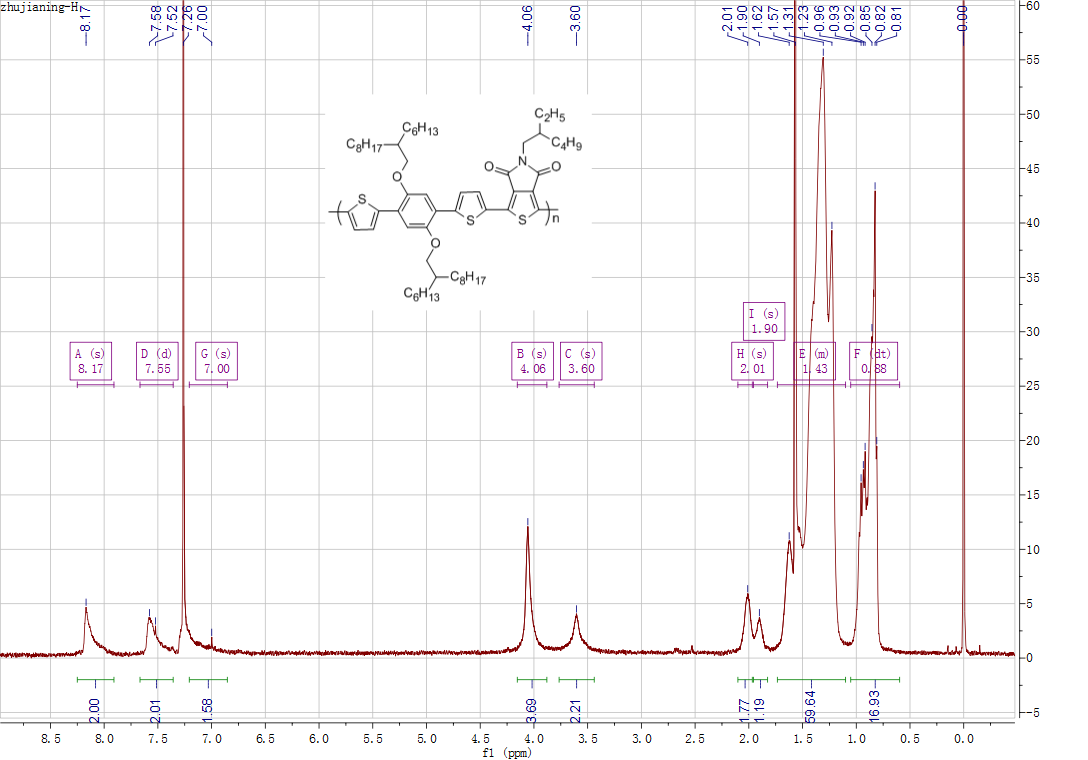

Supplement: Supplementary file 1 [file 15256514]
